# Supplementary material for: Excellent fluoride removal performance by electrospun La–Mn bimetal oxide nanofibers
Source: Royal Society of Chemistry journal article supplement (doi:10.1039/d1nj04976c), 2021-11-25
Supplement: d1nj04976c1.pdf [file d1nj04976c1.pdf]

## Supporting Information

### Excellent fluoride removal performance by electrospun La-Mn bimetal oxide nanofibers

Shaoju Jian<sup>a</sup>, Yiting Cheng<sup>a</sup>, Xiaofan Ma<sup>b</sup>, Hongtao Guo<sup>b</sup>, Jiapeng Hu<sup>a</sup>, Kaiyin Zhang<sup>c</sup>, Shaohua Jiang<sup>a,b\*</sup>, Weisen Yang<sup>a\*</sup> and Gaigai Duan<sup>a,b\*</sup>

#### Abbreviations

|                  |                                                                             |
|------------------|-----------------------------------------------------------------------------|
| $C_0$            | initial fluoride concentration ( $\text{mg L}^{-1}$ )                       |
| $C_e$            | equilibrium fluoride concentration ( $\text{mg L}^{-1}$ )                   |
| $m$              | mass of La-Mn adsorbent (g)                                                 |
| $V$              | volume of fluoride solution (L)                                             |
| $Q_e$            | adsorption capacity at equilibrium ( $\text{mg g}^{-1}$ )                   |
| $Q_m$            | maximum adsorption capacity ( $\text{mg g}^{-1}$ )                          |
| $Q_t$            | adsorption capacity at any time $t$ ( $\text{mg g}^{-1}$ )                  |
| PFO              | pseudo-first order                                                          |
| PSO              | pseudo-second order                                                         |
| $k_1$            | LPFO rate constant ( $\text{min}^{-1}$ )                                    |
| $k_2$            | LPSO rate constant ( $\text{g mg}^{-1}\text{min}^{-1}$ )                    |
| $k_{\text{int}}$ | intra-particle diffusion efficient ( $\text{g mg}^{-1}\text{min}^{-1/2}$ )  |
| $K_F$            | distribution coefficient ( $\text{L}^{1/n}\text{mg}^{1-1/n}\text{g}^{-1}$ ) |
| $n$              | correction factor                                                           |
| $t$              | time (min)                                                                  |
| $L$              | the thickness of boundary layer                                             |
| $k_{\text{int}}$ | constant of intra-particle diffusion ( $\text{g mg}^{-1}\text{min}^{1/2}$ ) |
| $b$              | constant of the Langmuir isotherm ( $\text{L mg}^{-1}$ )                    |
| $\Delta G$       | the Gibbs free energy change ( $\text{kJ mol}^{-1}$ )                       |
| $\Delta H$       | the enthalpy change ( $\text{kJ mol}^{-1}$ )                                |

- $\Delta S$  the entropy change ( $\text{kJ mol}^{-1} \text{K}^{-1}$ )
- $R$  the ideal gas constant ( $8.314 \text{ J mol}^{-1} \text{K}^{-1}$ )
- $T$  the absolute temperature (K)

Table S1 Comparison of specific surface area and adsorption capacity with other similar studies.

| adsorbents                                                         | BET ( $\text{m}^2 \text{g}^{-1}$ ) | Ref. |
|--------------------------------------------------------------------|------------------------------------|------|
| CeO <sub>2</sub> -ZrO <sub>2</sub> nanocages                       | 29.61                              | 1    |
| Zr-CTS beads                                                       | 0.14                               | 2    |
| $\gamma$ -Fe-CTB composite                                         | 0.15                               | 3    |
| La <sub>2</sub> O <sub>3</sub> -CeO <sub>2</sub> /laterite (LCL)   | 14.4                               | 4    |
| ZrO <sub>2</sub> /SiO <sub>2</sub> /Fe <sub>3</sub> O <sub>4</sub> | 4.6                                | 5    |
| tin-impregnated chitin (SnC)                                       | 2.83                               | 6    |
| Sn(IV) chloride impregnated chitosan (Sn-Ch)                       | 3.02                               | 7    |

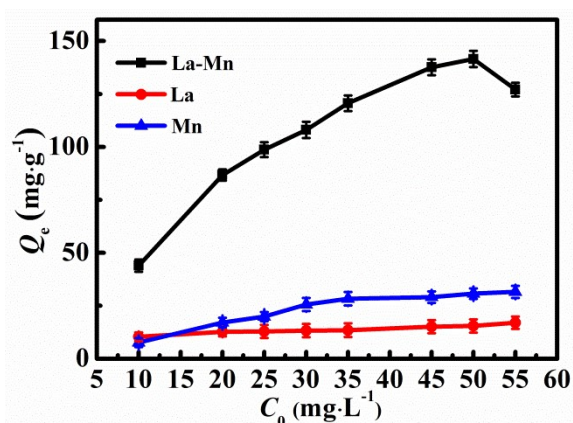

Fig. S1 Effect of fluoride concentration on fluoride ion adsorption on La-Mn bimetal oxide nanofibers, La nanofibers and Mn nanofibers. (dosage = 0.01 g, pH = 3, T = 298 K, V = 50 mL)

1. J. Wang, W. Xu, L. Chen, Y. Jia, L. Wang, X.-J. Huang and J. Liu, *Chemical Engineering Journal*, 2013, **231**, 198-205.
2. S. Tandekar, D. Saravanan and R. Jugade, 2020.
3. S. Tandekar, D. Saravanan, S. Korde and R. Jugade, *Materials Today: Proceedings*, 2020, **29**.
4. D. T. Lim, T. N. Tuyen, D. N. Nhiem, D. H. Duc, P. N. Chuc, N. Q. Bac, D. X. Tung, N. N. Pham, L. T. V. Ha, N. T. T. Tu, V. T. Nguyen, D. Q. Khieu and D. k. Yi, *Journal of Nanomaterials*, 2021, **2021**, 1-13.
5. C. F. Chang, C. Y. Chang and T. L. Hsu, *Desalination*, 2011, **279**, 375-382.
6. A. Shekhawat, S. S. Kahu, D. Saravanan and R. M. Jugade, *RSC Advances*, 2016, **6**, 18936-18945.

7. S. Kahu, A. Shekhawat, D. Saravanan and R. Jugade, *Int. J. Biol. Macromol.*, 2017, **104**, 1528-1538.
